# Supplementary material for: Inhibition of O-GlcNAc transferase activates tumor-suppressor gene expression in tamoxifen-resistant breast cancer cells
Source: PubMed Central journal article supplement (PMC7552408; doi:10.1038/s41598-020-74083-z), 2020-10-12
Supplement: 41598_2020_74083_MOESM1_ESM.pdf [file 41598_2020_74083_MOESM1_ESM.pdf]

**Inhibition of O-GlcNAc transferase activates tumor-suppressor gene expression in tamoxifen-resistant breast cancer cells**

Anna Barkovskaya, Kotryna Seip, Lina Prasmickaite, Ian G. Mills, Siver A. Moestue, Harri M. Itkonen

**Supplementary Table legend and Supplementary Figures with figure legends**

**Supplementary table. TamS and TamR cells were treated with 40 $\mu$ M OSMI-1 and RNA was used for microarray profiling. Sheet 1)** Differential gene expression based on microarray profiling of biological triplicate samples in TamS and TamR cell lines. **Sheet 2)** Biological Process pathway enrichment analysis using the STRING tool <sup>1</sup> for the top most up- and downregulated mRNAs based on sheet 1 (Log<sub>2</sub>(FC) at least  $\pm 0.5$ ). **Sheet 3)** Pathway enrichment analysis for the mRNAs downregulated in TamS and TamR cell lines (Log<sub>2</sub>(FC) $<-0.25$ ) using the Enrichr tool <sup>2</sup> and reporting KEGG pathways <sup>3-5</sup>. **Sheet 4)** Pathway enrichment analysis for the mRNAs downregulated exclusively in TamS and TamR cell lines (Log<sub>2</sub>(FC) $<-0.25$ ) using the Enrichr tool <sup>2</sup> and reporting KEGG pathways <sup>3-5</sup>. **Sheet 5)** Pathway enrichment analysis for the mRNAs upregulated exclusively in TamS and TamR cell lines (Log<sub>2</sub>(FC) $>+0.5$ ) using the STRING tool <sup>1</sup> and reporting Biological process. **Sheet 6)** Overlap between mRNAs downregulated log<sub>2</sub>FC $<-1.00$  in TamS / TamR cells and mRNAs-driven by super enhancers in MCF7 cells as reported previously <sup>6</sup>.

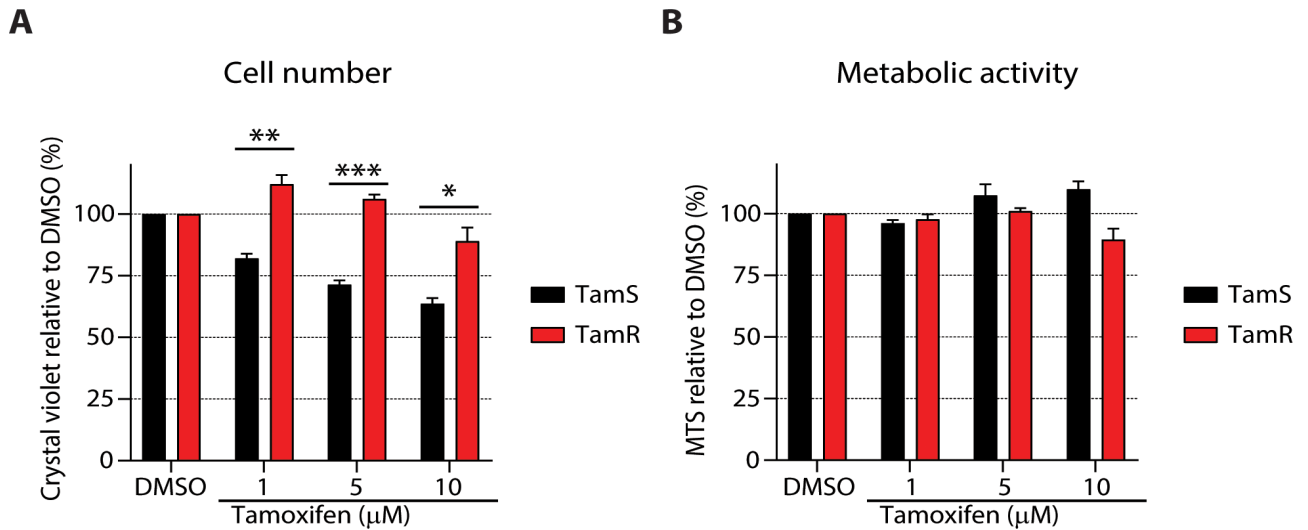

**Supplementary Figure 1. Evaluation of tamoxifen-sensitivity of TamS and TamR cells.** **A)** Cells were treated for three days and the relative number of cells was measured using crystal violet assay. Data shown is an average of 4 biological replicates with SEM. Student's t-test was used to evaluate statistical significance: \*- $p \leq 0.05$ , \*\*- $p \leq 0.01$ , \*\*\*- $p \leq 0.001$ . **B)** Metabolic activity of cells was evaluated after three days of treatment. Data shown is an average of 3 biological replicates with SEM.

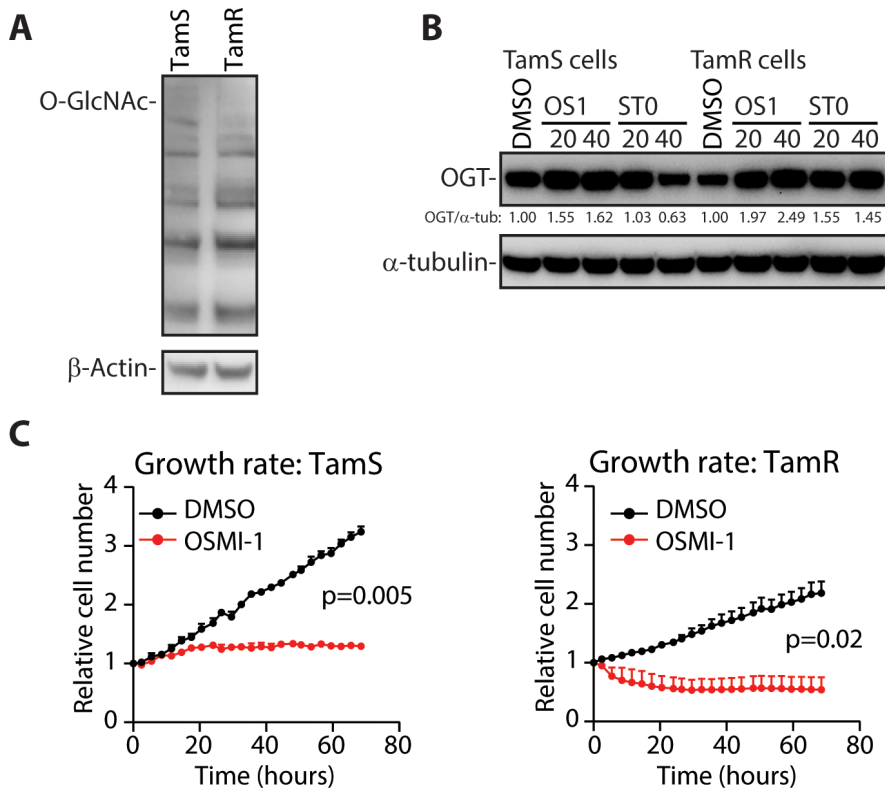

**Supplementary Figure 2. OSMI-1 treatment leads to a complete growth-arrest in TamR cells.**

**A)** Comparison of the baseline O-GlcNAc levels in TamS and TamR cells based on western blot. **B)** Cells were treated as indicated for 24 hours and analyzed using western blot (OSMI-1= OS1, ST045849= ST0, doses  $\mu$ M). Data is representative of two biological replicates. **C)** Growth-rate of cells was followed using Incucyte live-cell imaging system. Relative cell number was normalized to density at the time of treatment. Data shown is an average of three biological replicates with SEM. T-test was used to assess statistical significance of the data at 72 hours.

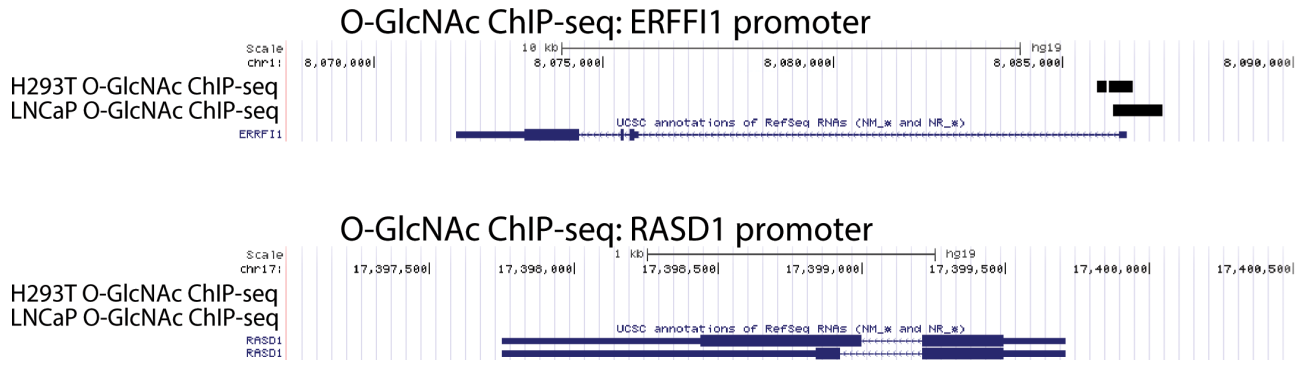

**Supplementary Figure 3. ERFF11 promoter shows enrichment for O-GlcNAc.** University of California, Santa Cruz (UCSC) Genome Browser screenshot of the selected chromatin regions showing O-GlcNAc ChIP-seq data previously reported for LNCaP <sup>7</sup> and H293T cells <sup>8</sup>.

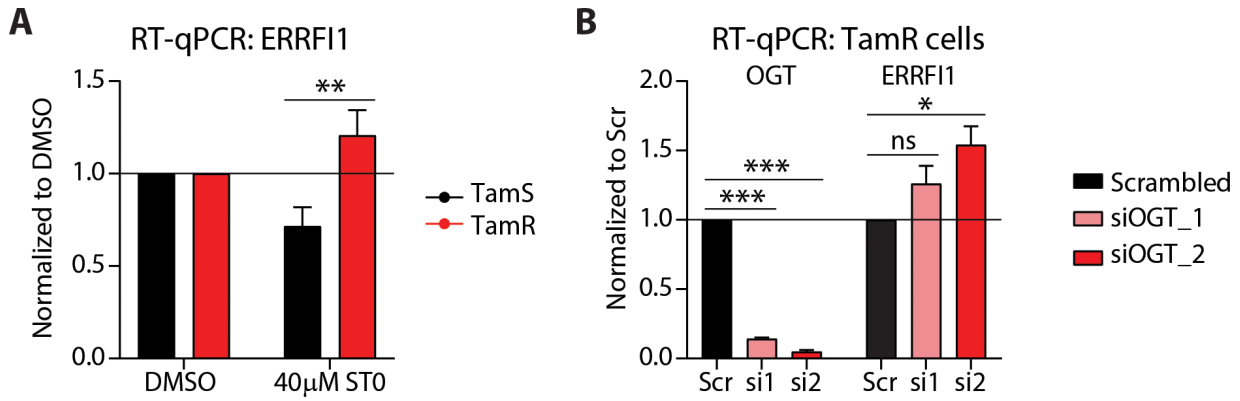

**Supplementary Figure 4. OGT inhibition increases expression of ERRF1 in TamR cells.** Total RNA was isolated from the cell pellets using TRIzol® reagent (Life Technologies). 1µg of RNA was reverse transcribed using cDNA Synthesis Kit (Quanta Biosciences, Geithersburg, MD). Housekeeping gene (YARS) primers are as follows: forward: GCCTACCCAGATCCCTCAAAG and Reverse: ATGACCTCCTCTGGTTCTGAATTC; OGT and ERRF1 primers, and RT-qPCR itself same as for the main figures. Data shown is an average of three biological replicates with SEM and student's t-test was used to evaluate statistical significance: \*- $p \leq 0.05$ , \*\*- $p \leq 0.01$ , \*\*\*- $p \leq 0.001$ . **A**) Cells were treated as indicated for 24 hours and analyzed using RT-qPCR. **B**) Cells were transfected with either OGT-targeting siRNAs or scrambled control, and analyzed using RT-qPCR for mRNAs of interest.

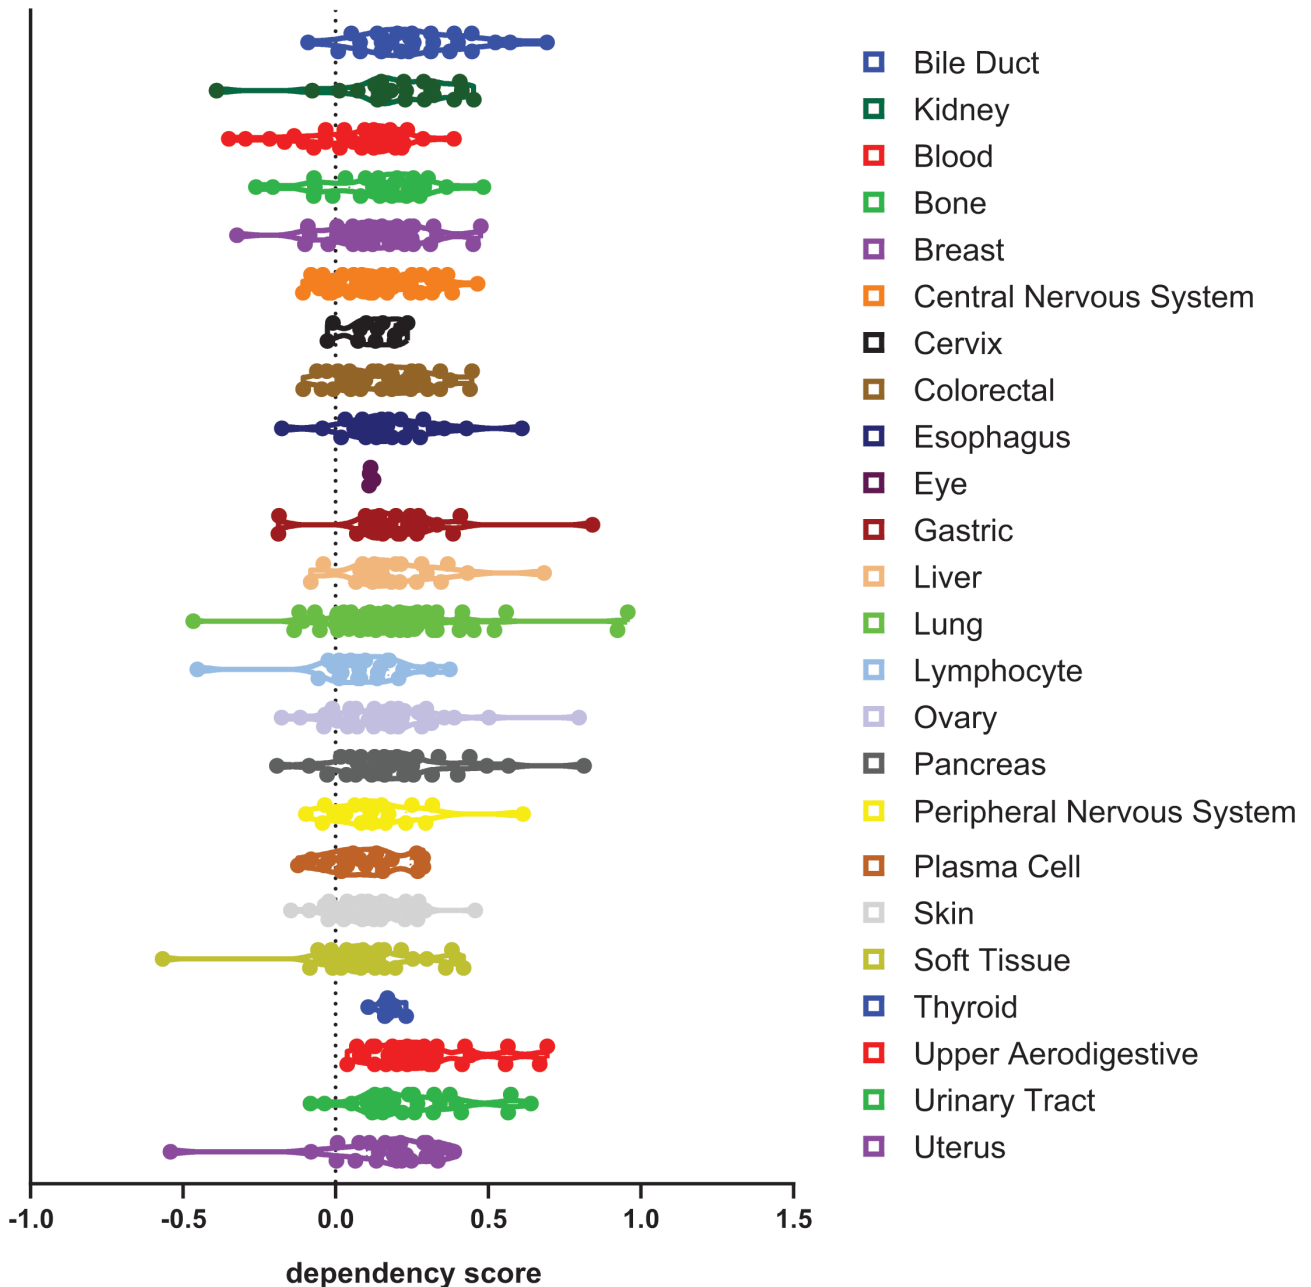

**Supplementary Figure 5. CRISPR-mediated knockout of ERRF11 promotes proliferation of cancer cell lines.** ERRF11 dependency score in cancer cell lines derived from different tissues. Data is acquired from depmap.org resource <sup>9,10</sup>. Data were collected from 342 cell lines where CRISPR knockout of ERRF11 was induced. A score above 0 indicates that a knockout increases cell growth, while a score below 0 indicates growth inhibition. A score of -1 corresponds to the mean growth inhibition induced by the knockout of common essential genes. A score above 0 suggests tumor suppressive function of a gene.





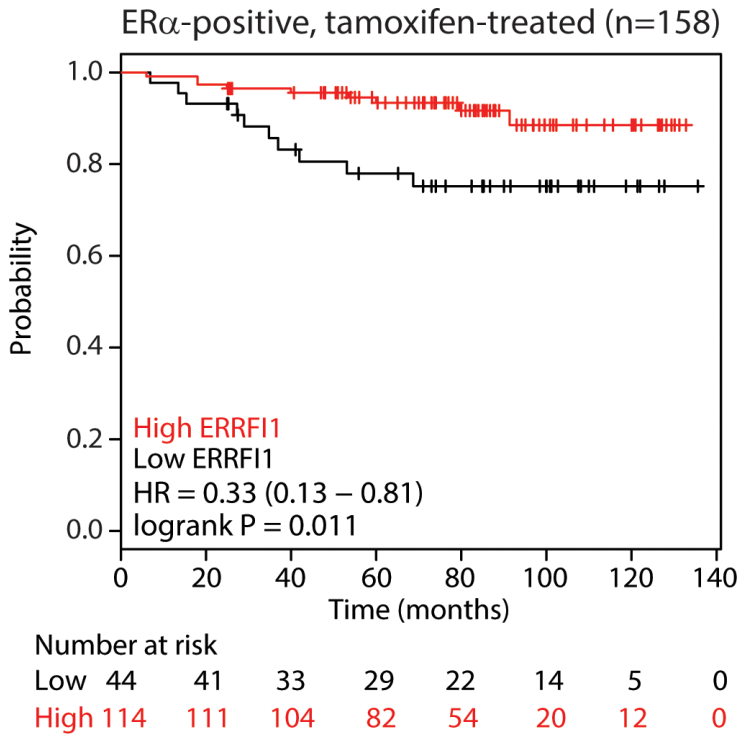

**Supplementary Figure 7. High expression of ERFFI is associated with positive prognosis in breast cancer patients treated with tamoxifen.** Survival of breast cancer patients with low or high expression of ERFF1 mRNA. The plot was generated using Kaplan-Meier Plotter (mRNA gene chip, all probe sets for the gene, autoselect best cutoff, ER $\alpha$ -positive cases based on gene expression, tamoxifen-only systemic treatment and other settings as default)<sup>12</sup>.

**A**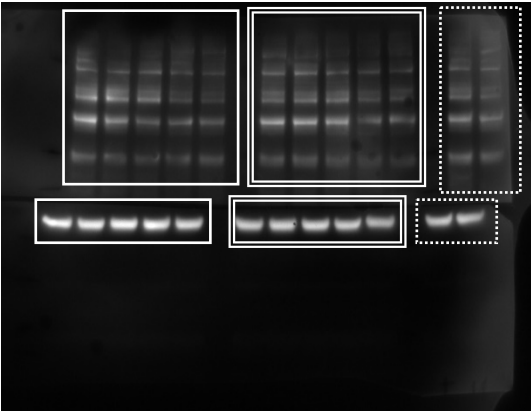**B**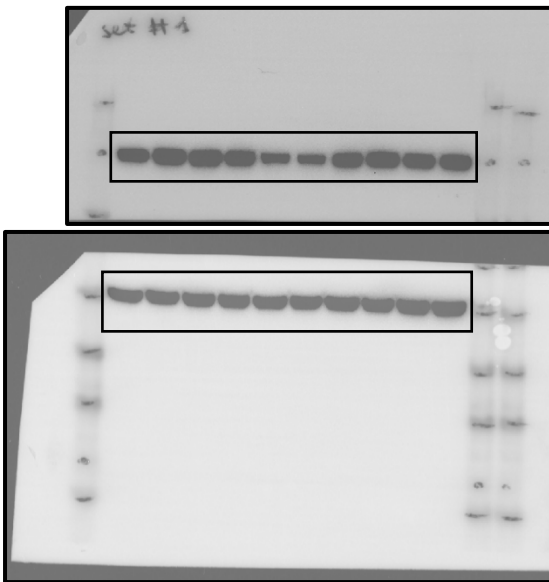

**Supplementary Figure 8. Full size western blot images.** Chemiluminescent images were generated using G-Box from Syngene™ (A) and Image lab software from BioRad™ (B). **A)** Original western blot data that was used to generate figure 1A (solid and double frames), and figure S2A (dotted frame). The western blot above is total-O-GlcNAc blot and below  $\beta$ -actin blot. **B)** Original western blot data that was used to generate figure S2B. The western blot above is an OGT blot and below  $\beta$ -tubulin blot.

**References:**

- 1 Szklarczyk, D. *et al.* STRING v11: protein-protein association networks with increased coverage, supporting functional discovery in genome-wide experimental datasets. *Nucleic Acids Res* **47**, D607-D613, doi:10.1093/nar/gky1131 (2019).
- 2 Kuleshov, M. V. *et al.* Enrichr: a comprehensive gene set enrichment analysis web server 2016 update. *Nucleic Acids Res* **44**, W90-97, doi:10.1093/nar/gkw377 (2016).
- 3 Kanehisa, M. & Goto, S. KEGG: kyoto encyclopedia of genes and genomes. *Nucleic acids research* **28**, 27-30, doi:10.1093/nar/28.1.27 (2000).
- 4 Kanehisa, M., Sato, Y., Furumichi, M., Morishima, K. & Tanabe, M. New approach for understanding genome variations in KEGG. *Nucleic acids research* **47**, D590-D595, doi:10.1093/nar/gky962 (2019).
- 5 Kanehisa, M. Toward understanding the origin and evolution of cellular organisms. *Protein science : a publication of the Protein Society* **28**, 1947-1951, doi:10.1002/pro.3715 (2019).
- 6 Khan, A. & Zhang, X. dbSUPER: a database of super-enhancers in mouse and human genome. *Nucleic Acids Res* **44**, D164-171, doi:10.1093/nar/gkv1002 (2016).
- 7 Itkonen, H. M. *et al.* High OGT activity is essential for MYC-driven proliferation of prostate cancer cells. *Theranostics* **9**, 2183-2197, doi:10.7150/thno.30834 (2019).
- 8 Deplus, R. *et al.* TET2 and TET3 regulate GlcNAcylation and H3K4 methylation through OGT and SET1/COMPASS. *EMBO J* **32**, 645-655, doi:10.1038/emboj.2012.357 (2013).
- 9 Meyers, R. M. *et al.* Computational correction of copy number effect improves specificity of CRISPR-Cas9 essentiality screens in cancer cells. *Nat Genet* **49**, 1779-1784, doi:10.1038/ng.3984 (2017).
- 10 Dempster, J. M., Rossen, J., Kazachkova, M., Pan, J., Kugener, G., Root, D. E., & Tsherniak, A. . Extracting Biological Insights from the Project Achilles Genome-Scale CRISPR Screens in Cancer Cell Lines. *BioRxiv*, doi:10.1101/720243 (2019).
- 11 Rhodes, D. R. *et al.* ONCOMINE: a cancer microarray database and integrated data-mining platform. *Neoplasia* **6**, 1-6, doi:10.1016/s1476-5586(04)80047-2 (2004).
- 12 Nagy, A., Lanczky, A., Menyhart, O. & Gyorffy, B. Validation of miRNA prognostic power in hepatocellular carcinoma using expression data of independent datasets. *Sci Rep* **8**, 9227, doi:10.1038/s41598-018-27521-y (2018).
